# Supplementary material
Source: PubMed Central journal article supplement (PMC11057914)
Supplement: NIHMS1640354-supplement-Supp__Materials.pdf [file NIHMS1640354-supplement-Supp__Materials.pdf]

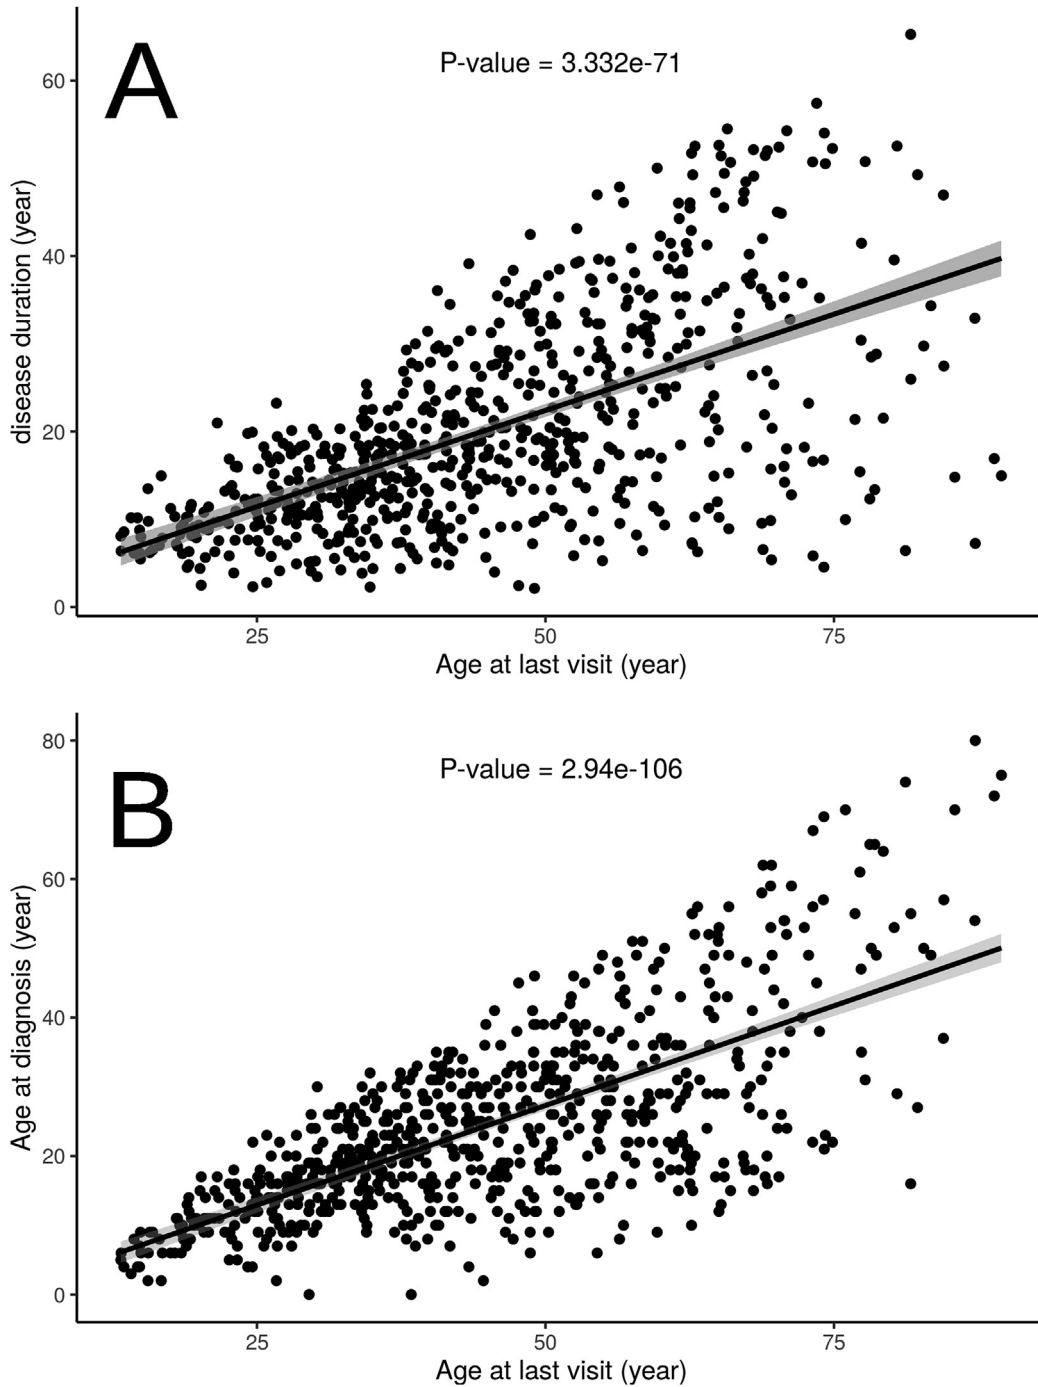

**Supplementary Figure 1.** Association of age at last visit with disease duration and age at diagnosis. (A) Association between age at last visit and disease duration. *X-axis* represents age at last visit and *Y-axis* represents disease duration. *P* value for association was calculated by linear regression without any covariates. *Blue line* represents regression line and *shaded area* represents 95% confidence. (B) Association between age at last visit and age at diagnosis. The form of figure is the same as described in (A).

**Supplementary Table 1.**List of Candidate Thromboembolic Disease-Related Genes

| Gene                 | Associated disease                                                           |
|----------------------|------------------------------------------------------------------------------|
| <i>F5</i>            | Factor V Leiden                                                              |
| <i>F2</i>            | Prothrombin mutation                                                         |
| <i>PROC</i>          | Protein C deficiency                                                         |
| <i>PROS1</i>         | Protein S deficiency                                                         |
| <i>SERPINC1</i>      | Antithrombin III deficiency                                                  |
| <i>THBD</i>          | Defect in thrombomodulin                                                     |
| <i>ADAMTS13</i>      | Thrombotic thrombocytopenic purpura                                          |
| <i>MTR</i>           | Elevated homocysteine                                                        |
| <i>APOA</i>          | Elevated lipoprotein(a)                                                      |
| <i>FGA, FGB, FGG</i> | Congenital dysfibrinogenemia                                                 |
| <i>F8</i>            | Elevated factor VIII                                                         |
| <i>HRG</i>           | Thrombophilia due to both elevated and deficient histidine-rich glycoprotein |
| <i>KNG1</i>          | High-molecular-weight kininogen deficiency                                   |

**Supplementary Table 2.**Thrombophilia Pathogenic Variants Identified in Our Whole-Exome Sequencing Cohort

| CHR | POS <sup>a</sup> | REF | ALT | Genes           | Definition in CLINVAR <sup>b</sup> | Related disease in CLINVAR                                  | No. of IBD subjects (total) | No. of IBD subjects with TED |
|-----|------------------|-----|-----|-----------------|------------------------------------|-------------------------------------------------------------|-----------------------------|------------------------------|
| 1   | 169519049        | T   | C   | <i>F5</i>       | Drug response                      | Hormonal contraceptives for systemic use response, toxicity | 37                          | 5                            |
| 1   | 169524537        | C   | G   | <i>F5</i>       | Pathogenic                         | Thrombophilia due to activated protein C resistance         | 2                           | 1                            |
| 1   | 173883881        | G   | A   | <i>SERPINC1</i> | Pathogenic                         | Reduced antithrombin III activity/antithrombin deficiency   | 1                           | 1                            |
| 9   | 136291338        | G   | C   | <i>ADAMTS13</i> | Likely pathogenic                  | Upshaw-Schulman syndrome                                    | 1                           | 0                            |
| 9   | 136302010        | C   | T   | <i>ADAMTS13</i> | Likely pathogenic                  | Upshaw-Schulman syndrome                                    | 1                           | 1                            |
| 11  | 46747447         | G   | A   | <i>F2</i>       | Pathogenic                         | Prothrombin type 3                                          | 3                           | 2                            |
| 11  | 46761055         | G   | A   | <i>F2</i>       | Pathogenic                         | Venous thrombosis                                           | 40                          | 3                            |

ALT, alternative allele; CHR, chromosome; POS, position; REF, reference allele.

<sup>a</sup>Chromosomal positions are based on the Genome Reference Consortium human build 37 (GRCh37).

<sup>b</sup>Definition in CLINVAR is based on [ftp://ftp.ncbi.nlm.nih.gov/pub/clinvar/vcf\\_GRCh37/archive\\_2.0/2019/clinvar\\_20190722.vcf](ftp://ftp.ncbi.nlm.nih.gov/pub/clinvar/vcf_GRCh37/archive_2.0/2019/clinvar_20190722.vcf).

**Supplementary Table 3.** Distribution of Thromboembolic Disease Polygenic Risk Score and Frequency of 2 major Thrombophilia Pathogenic Variants Among Patients With Inflammatory Bowel Disease and Controls

| Variable                                      | Control            | IBD           | <i>P</i> value <sup>a</sup> | $\beta$ | SE     |
|-----------------------------------------------|--------------------|---------------|-----------------------------|---------|--------|
| TED PRS, mean $\pm$ SD                        | -0.054 $\pm$ 0.999 | 0.015 $\pm$ 1 | .835                        | .0048   | 0.0229 |
| Factor V Leiden, %                            | 2.747              | 2.287         | .258                        | -.1144  | 0.1012 |
| Prothrombin ( <i>F2</i> ) G20210A mutation, % | 1.464              | 1.917         | .937                        | -.0105  | 0.1329 |

<sup>a</sup>*P* values were calculated by logistic regression with 2 principal components.

**Supplementary Table 4.** Multivariate Analysis of Thromboembolic Disease History for Age at Last Visit, History of Inflammatory Bowel Disease Bowel Surgery, and Genetic Risk With Variance Inflation Factor<sup>a</sup>

| Variable                                          | <i>P</i> value | OR   | 95% CI    | VIF  |
|---------------------------------------------------|----------------|------|-----------|------|
| Results with genetic risk                         |                |      |           |      |
| Genetic risk (high) <sup>b</sup>                  | .0035          | 2.51 | 1.35–4.65 | 1.01 |
| History of IBD bowel surgery                      | .0201          | 2.08 | 1.12–3.87 | 1.03 |
| Age at last visit                                 | .00003         | 1.04 | 1.02–1.05 | 1.03 |
| Results with separated genetic risk (TPV and PRS) |                |      |           |      |
| PRS (high) <sup>c</sup>                           | .0070          | 3.13 | 1.37–7.18 | 1.01 |
| TPV carrier <sup>d</sup>                          | .0433          | 2.11 | 1.02–4.34 | 1.01 |
| History of IBD bowel surgery                      | .0241          | 2.04 | 1.10–3.79 | 1.03 |
| Age at last visit                                 | .00002         | 1.04 | 1.02–1.06 | 1.03 |

CI, confidence interval; VIF, variance inflation factor.

<sup>a</sup>*P* values, ORs, and VIFs were calculated by logistic regression with 2 principal components.

<sup>b</sup>Genetic risk (high) is defined as having a high TED polygenic risk score (more than the top 5% of the control population distribution) or carried at least 1 TPV.

<sup>c</sup>PRS (high) is defined as more than the top 5% of the control population distribution of TED PRS.

<sup>d</sup>TPV carrier is defined as having at least 1 TPV.

**Supplementary Table 5.** Multivariate Analysis of Thromboembolic Disease History for Time-Dependent Parameters, History of Inflammatory Bowel Disease Bowel Surgery and Genetic Risk With Variance Inflation Factor<sup>a</sup>

| Variable                                                                                               | <i>P</i> value | OR   | 95% CI    | VIF   |
|--------------------------------------------------------------------------------------------------------|----------------|------|-----------|-------|
| Results with all time-dependent parameters (disease duration, age at diagnosis, and age at last visit) |                |      |           |       |
| Genetic risk (high) <sup>b</sup>                                                                       | .0035          | 2.52 | 1.35–4.68 | 1.01  |
| History of IBD bowel surgery                                                                           | .0159          | 2.18 | 1.16–4.09 | 1.06  |
| Disease duration                                                                                       | .6043          | 0.98 | 0.90–1.06 | 13.65 |
| Age at diagnosis                                                                                       | .7444          | 0.99 | 0.91–1.07 | 17.11 |
| Age at last visit                                                                                      | .2227          | 1.06 | 0.97–1.15 | 26.50 |
| Results with 2 time-dependent parameters (disease duration and age at last visit)                      |                |      |           |       |
| Genetic risk (high) <sup>b</sup>                                                                       | .0034          | 2.53 | 1.36–4.70 | 1.01  |
| History of IBD bowel surgery                                                                           | .0152          | 2.18 | 1.16–4.11 | 1.06  |
| Disease duration                                                                                       | .4774          | 0.99 | 0.97–1.02 | 1.63  |
| Age at last visit                                                                                      | .0001          | 1.04 | 1.02–1.06 | 1.57  |
| Results with 2 time-dependent parameters (age at diagnosis and age at last visit)                      |                |      |           |       |
| Genetic risk (high) <sup>b</sup>                                                                       | .0034          | 2.52 | 1.36–4.69 | 1.01  |
| History of IBD bowel surgery                                                                           | .0164          | 2.17 | 1.15–4.07 | 1.06  |
| Age at diagnosis                                                                                       | .5560          | 1.01 | 0.98–1.03 | 2.04  |
| Age at last visit                                                                                      | .0065          | 1.03 | 1.01–1.06 | 2.10  |

CI, confidence interval; VIF, variance inflation factor.

<sup>a</sup>*P* values, ORs, and VIFs were calculated by logistic regression with 2 principal components.

<sup>b</sup>Genetic risk (high) is defined as having a high TED polygenic risk score (more than the top 5% of the control population distribution) or carried at least 1 TPV.

**Supplementary Table 6.** Association Between the Presence of Thrombophilia Pathogenic Variants and Polygenic Risk Score and History of Inflammatory Bowel Disease–Related Surgery and Extensive Disease<sup>a</sup>

| Variable                       | Presence of TPVs, n (%) |             | P value | OR (95% CI)      |
|--------------------------------|-------------------------|-------------|---------|------------------|
|                                | Carrier <sup>b</sup>    | Noncarrier  |         |                  |
| History of IBD-related surgery | 43 (59.72)              | 380 (59.10) | .91     | 1.03 (0.62–1.69) |
| Extensive disease (E3 or L3)   | 54 (75.00)              | 443 (68.90) | .18     | 1.52 (0.82–2.82) |
| Variable                       | PRS, n (%)              |             | P value | OR (95% CI)      |
|                                | High <sup>c</sup>       | Low         |         |                  |
| History of IBD-related surgery | 26 (59.09)              | 397 (59.17) | .92     | 0.97 (0.52–1.81) |
| Extensive disease (E3 or L3)   | 29 (65.91)              | 468 (69.75) | .27     | 0.70 (0.36–1.33) |

CI, confidence interval.

<sup>a</sup>P values and ORs were calculated by logistic regression with 2 principal components.

<sup>b</sup>TPV carrier is defined as having at least 1 TPV.

<sup>c</sup>PRS high is defined as more than the top 5% of the control population distribution of TED PRS.
